# Supplementary material
Source: PubMed Central journal article supplement (PMC3549628)
Supplement: Supp_Fig1.pdf [file Supp_Fig1.pdf]

## Supplementary Data

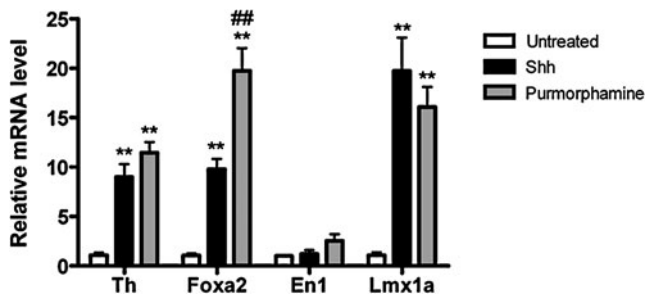

SUPPLEMENTARY FIG. S1. Hh signaling by Shh and purmorphamine similarly upregulated specific mDAergic markers at the end of the 5-stage differentiation protocol. Relative mRNA expression levels for the specific markers *Th*, *Foxa2*, *En1*, and *Lmx1a* after treatment with Shh (200 ng/mL) or with the small molecule agonist purmorphamine (2  $\mu$ M) in stage IV, as compared to untreated control. Levels of expression are presented as mean  $\pm$  SEM;  $n=3$ ; \*\* $P<0.01$  significantly different from untreated control by Student-Newman-Keul's post hoc test. ## $P<0.01$  significantly different from Shh treatment by Student-Newman-Keul's post hoc test. Hh, Hedgehog; Shh, Sonic hedgehog; mDAergic mid-brain dopaminergic; SEM, standard error of the mean.
