# Supplementary material
Source: PubMed Central journal article supplement (PMC3549628)
Supplement: Supp_Fig2.pdf [file Supp_Fig2.pdf]

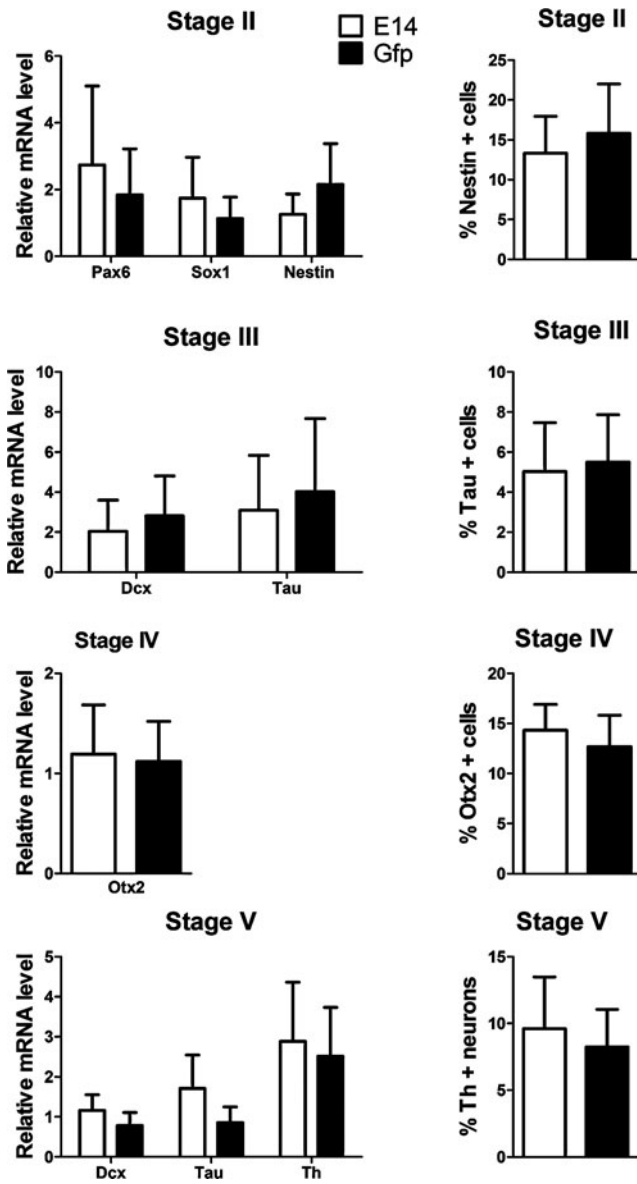

**SUPPLEMENTARY FIG. S2.** Milestone-related marker expressions in the 5-stage dopaminergic differentiation experiments do not depend on the ES cell line. Relative mRNA expression levels for *Pax6*, *Sox1*, *Nestin*, *Tau*, *Dcx*, *Otx2*, and *Th* and cell counting for *Nestin*, *Tau*, *Otx2*, and *Th* in relevant stages (see Supplementary Table S2) were compared between 2 ES cell line-related experiments and presented as mean  $\pm$  SEM;  $n=3$ ; the expression levels obtained from line B6G-eGfp did not significantly differ from those from line E14tg2a by Student *t*-test ( $P>0.05$ ). ES, embryonic stem.
