# Supplementary material
Source: PubMed Central journal article supplement (PMC3549628)
Supplement: Supp_Fig3.pdf [file Supp_Fig3.pdf]

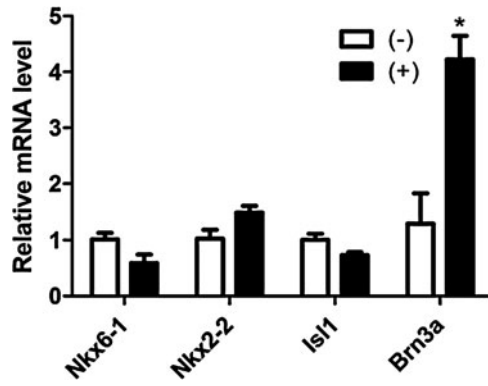

SUPPLEMENTARY FIG. S3. Expression of the midbrain basal plate markers at the end of the 5-stage dopaminergic differentiation experiments with positive and negative outcome. Relative mRNA expression levels of *Nkx6-1*, *Nkx2-2*, *Isl1*, and *Brn3a* in experiments with positive (+) and negative (-) outcome, presented as mean  $\pm$  SEM;  $n=3$ ; \* $P<0.05$  significantly different from (-) experiments by Student *t*-test.
