# Supplementary material
Source: PubMed Central journal article supplement (PMC3549628)
Supplement: Supp_Table1.pdf [file Supp_Table1.pdf]

SUPPLEMENTARY TABLE S1. PRIMERS FOR QUANTITATIVE REAL-TIME-POLYMERASE CHAIN REACTION

| Gene             | Forward primer                | Reverse primer                 |
|------------------|-------------------------------|--------------------------------|
| <i>Afp</i>       | 5'-TTCACAGAAGAGGGTCCAAAG-3'   | 5'-AAAAGGCTCACACCAAAGAGTC-3'   |
| <i>Bmp4</i>      | 5'-GCCAACACTGTGAGGAGTTTC-3'   | 5'-TCTGGGATGCTGCTGAGGTT-3'     |
| <i>Brachyury</i> | 5'-GGAACAGCTCTCCAACCTATG-3'   | 5'-TGGGCTGGCGTTATGACTC-3'      |
| <i>Brn3a</i>     | 5'-ACTGGGGAGCTGAGGGGT-3'      | 5'-GAAACGAACAAGGTGGGAGG-3'     |
| <i>Calbindin</i> | 5'-ATATGATCAGGATGGCAACGG-3'   | 5'-CTTCCCTCCATCCGACAAG-3'      |
| <i>Dat</i>       | 5'-GGTCTTCCGAGAGAAACTG-3'     | 5'-TCTCCTTCCACTTTACACCAAC-3'   |
| <i>Dcx</i>       | 5'-GGCGATTCCATGTGAAAGATG-3'   | 5'-AGTGGCCAGAGAAGAGAAGTC-3'    |
| <i>eGfp</i>      | 5'-AAGCAGAAGAACGGCATCAAG-3'   | 5'-GTGCTCAGGTAGTGGTTGTC-3'     |
| <i>En1</i>       | 5'-GTCCGTCCTCTGGTCCAC-3'      | 5'-CGTGATATAGCGGTTTGCTG-3'     |
| <i>Fgf2</i>      | 5'-CTGGCTTCTAAGTGTGTTACAG-3'  | 5'-ATACTGCCAGTTCGTTTCAG-3'     |
| <i>Fgf8</i>      | 5'-CCTTCGCGAAGCTCATTGTG-3'    | 5'-AGTCCTTGCCTTTGCCGTTG-3'     |
| <i>Fgfr3</i>     | 5'-GCTGCACACATGACCTGTAC-3'    | 5'-GTCCAAGTACTCGTCGGTTG-3'     |
| <i>Foxa2</i>     | 5'-GTACTCCAGGCCTATTATGAAC-3'  | 5'-TTCCTCAAAGCTCTCCCAAAG-3'    |
| <i>Foxg1</i>     | 5'-TGATTCCCAAGTCCTCGTTC-3'    | 5'-GTGGTGATGATGATGGTGATG-3'    |
| <i>Gad1</i>      | 5'-ATGGTGAGCCTGAGCACAC-3'     | 5'-CCACCATGGTTGTTTCTGAC-3'     |
| <i>Gapdh</i>     | 5'-AGGGCTCATGACCACAGTC-3'     | 5'-CAGCTCTGGGATGACCTTG-3'      |
| <i>Gata4</i>     | 5'-ATCTAAGACGCCAGCAGGTC-3'    | 5'-GTGCCCATAGTGAGATGACAG-3'    |
| <i>Gfap</i>      | 5'-CGGCACGAACGAGTCCCTA-3'     | 5'-CTAGCTTAACGTTGAGTAGATCC-3'  |
| <i>Girk2</i>     | 5'-AAGTTGATCAAGTCCAAACAGAC-3' | 5'-ATGGCTAATAATCAATGGTGACAC-3' |
| <i>Gli1</i>      | 5'-CACTCCAATGAGAAGCCATAC-3'   | 5'-CATCCCCTCGATGCCGCT-3'       |
| <i>Gli2</i>      | 5'-CCAACCAGAACAAGCAGAACA-3'   | 5'-GCTCCTGTGTCAGTCCAAG-3'      |
| <i>Gli3</i>      | 5'-TTACATGTGCCTTCTGCCTTATC-3' | 5'-ATGTAGTCCATATATGGGTTGATG-3' |
| <i>Hoxb1</i>     | 5'-ACAGCGAAGGTGTCCGAG-3'      | 5'-GTTGAAATGAAATTCCTTCTCCAG-3' |
| <i>Hoxb9</i>     | 5'-GTGCCAGCACCTTCCAAC-3'      | 5'-CTTCGGCACTTCCCCAAG-3'       |
| <i>Irx5</i>      | 5'-CTTCTCTTACGTGGGCTCTC-3'    | 5'-GTTCTTGGCGGTGCTCGTTG-3'     |
| <i>Isl1</i>      | 5'-AACGACAAAATAATATCCAGGG-3'  | 5'-GCAAGGCGAAGTCACTCAG-3'      |
| <i>Lmx1a</i>     | 5'-AGCGAGCCAAGATGAAGAAG-3'    | 5'-GAGTTGTAGACGCTCTGTTC-3'     |
| <i>Nanog</i>     | 5'-CCACCAGGTGAAATATGAGAC-3'   | 5'-TATTTGGAAGAAGGAAGGAACC-3'   |
| <i>Ncad</i>      | 5'-AGACCAGGACTATGACTTGAG-3'   | 5'-CTCGTCTAGCCGTCTGATTC-3'     |
| <i>Nestin</i>    | 5'-AAGTGGCTACATACAGGACTC-3'   | 5'-TGAGGACAGGGAGCACAGA-3'      |
| <i>Nkx2-2</i>    | 5'-GCCTCCAATACTCCCTGC-3'      | 5'-CTTCCGCTTCTTGCCTGC-3'       |
| <i>Nkx6-1</i>    | 5'-AGTCAGGTCAAGGTCTGGTTC-3'   | 5'-GGTTTGTGTGTAATCGTCGTCATC-3' |
| <i>Oct4</i>      | 5'-GGATGTGGTTCGAGTATGGTTC-3'  | 5'-GTAGAGTGTGGTGAAGTGGG-3'     |
| <i>Osp</i>       | 5'-CCTTATTCTGCTGGCTCTCTG-3'   | 5'-CACCCACCAGGCACATCAC-3'      |
| <i>Otx2</i>      | 5'-AGGGTGCAGGTATGGTTTAAAG-3'  | 5'-TGGTTGGGACTGAGGTACTAG-3'    |
| <i>Pax6</i>      | 5'-ACACCTGTCTCCTCCTTAC-3'     | 5'-GGTTGCATAGGCAGGTTGTTG-3'    |
| <i>Pax7</i>      | 5'-AGTATGGCCAAACTGCTGTG-3'    | 5'-GACCCTAGTAGGCTTGTC-3'       |
| <i>Ptch1</i>     | 5'-TGAGGTGTCTCCAGCCAATG-3'    | 5'-AGCTCCTCACTGATGCCAG-3'      |
| <i>Shh</i>       | 5'-GAAAGCAGAGAATCCGTGG-3'     | 5'-AGGAAGTGAGGAAGCGC-3'        |
| <i>Smo</i>       | 5'-GCAACTCCAGTGCCACCAG-3'     | 5'-GCACACCTCCTTCTTCTC-3'       |
| <i>Sox1</i>      | 5'-CTCGAGCCCTTCTCACTTG-3'     | 5'-CCAGAATATAACTCCACCGTC-3'    |
| <i>Syn1</i>      | 5'-TCCCACAGCCAGTCTTCATC-3'    | 5'-GGGTGCTTGTGAGCAGG-3'        |
| <i>Tau</i>       | 5'-GGAGGCAGTGTGCAAATAGTC-3'   | 5'-TATTATCCAAGGAGCCAATCTTC-3'  |
| <i>Th</i>        | 5'-AAGGACAAGCTCAGGAACTATG-3'  | 5'-GCATTTAGCTAATGGCACTCAG-3'   |
| <i>Vacht</i>     | 5'-TGTGAGGACGACTACAACACTAC-3' | 5'-TAGGGTACTCATTAGAGGAGG-3'    |
| <i>vGlut2</i>    | 5'-GACAAAGAATAAGTCCCGTGAAG-3' | 5'-TCTCTCCTGAGGCAAATAGTG-3'    |
| <i>Vmat2</i>     | 5'-GTATGCTATCGGTCCCTCTG-3'    | 5'-GAGTGACATCTTTGTCTTAATGG-3'  |
| <i>Wnt1</i>      | 5'-AAGATCGTCAACCGAGGCTG-3'    | 5'-CCAAAATCGATGTTGCTACTGC-3'   |
| <i>Wnt3a</i>     | 5'-CCATGAACCGTCACAACAATG-3'   | 5'-TTCTTACCACCATCTCCGAG-3'     |
| <i>Wnt5a</i>     | 5'-ATGAAGCAGGCCGTAGGACA-3'    | 5'-GCCGCGTATCATACTTCTC-3'      |
