# Supplementary material
Source: PubMed Central journal article supplement (PMC3549628)
Supplement: Supp_Table2.pdf [file Supp_Table2.pdf]

SUPPLEMENTARY TABLE S2. MOLECULAR PROFILING IN EACH 5-STAGE DOPAMINERGIC DIFFERENTIATION EXPERIMENT FOR THE MILESTONE-RELATED MARKERS. INITIAL EXPERIMENTS FOR 2 MOUSE EMBRYONIC STEM CELL LINES (E14TG2A AND B6G-eGFP)

| ES cell line | Experiment | Stage II |      |        | Stage III |     |      | Stage IV |      |          | Stage V |     |     | Outcome  |          |            |
|--------------|------------|----------|------|--------|-----------|-----|------|----------|------|----------|---------|-----|-----|----------|----------|------------|
|              |            | Pax6     | Sox1 | Nestin | %Nestin   | Dcx | Tau  | %Tau     | Otx2 | %Otx2    | Th      | Dcx | Tau |          | %Tau     | %Th+ /Tau+ |
| B6G-eGfp     | 1          | 9        | 7.3  | 9.7    | 10.0±3.5  | 6.3 | 11.4 | 2.2±1.9  | 4.8  | 16.5±4.0 | 7.5     | 3.5 | 4.2 | 25.8±5.3 | 10.9±2.8 | +          |
| E14tg2a      | 2          | 9        | 7.2  | 10.7   | 7.7±2.4   | 6.8 | 10.6 | 3.5±1.8  | 5.8  | 15.3±2.8 | 7.2     | 2.7 | 2.4 | 32.5±3.2 | 14.3±3.3 | +          |
| E14tg2a      | 3          | 9.7      | 8.2  | 10     | 9.8±4.8   | 8.1 | 11.3 | 1.8±1.6  | 4.6  | 18.2±3.2 | 7.7     | 3.3 | 3.1 | 28.9±4.5 | 12.6±3.1 | +          |
| B6G-eGfp     | 4          | 6.1      | 5.2  | 8.2    | 24.7±6.1  | 2.8 | 5.2  | 12.7±4.1 | 6.7  | 9.2±2.1  | 12.3    | 5.0 | 5.3 | 15.0±5.2 | 2.8±2.5  | -          |
| B6G-eGfp     | 5          | 5.7      | 5.4  | 7.5    | 28.2±7.6  | 3.5 | 5.9  | 10.1±2.4 | 9.5  | 6.5±2.3  | 12.6    | 6.5 | 5.6 | 12.2±4.2 | 2.6±1.7  | -          |
| E14tg2a      | 6          | 5        | 4.6  | 8.4    | 22.5±8.9  | 3.9 | 6.3  | 11.8±4.3 | 6.7  | 9.5±1.9  | 13.7    | 4.7 | 5.6 | 13.4±8.4 | 1.9±1.5  | -          |

For quantitative RT-PCR data, levels of expression are presented as  $\Delta Ct$  for each experiment.  $\Delta Ct > 14$  is considered as not detected. For quantitative immunostaining, data represent percentages of positive cells relative to the nuclei stained with DAPI or relative to Tau-positive cells (for Th counting) and are presented as mean  $\pm$  SEM,  $n = 3$ .

ES, embryonic stem; eGfp, enhanced green fluorescent protein; DAPI, 4', 6-diamidino-2-phenylindole; SEM, standard error of the mean; Th, tyrosine hydroxylase; RT-PCR, real-time-polymerase chain reaction.
