# Supplementary material
Source: PubMed Central journal article supplement (PMC3549628)
Supplement: Supp_Table3.pdf [file Supp_Table3.pdf]

SUPPLEMENTARY TABLE S3. MOLECULAR PROFILING IN EACH 5-STAGE DOPAMINERGIC DIFFERENTIATION EXPERIMENT FOR THE MILESTONE-RELATED MARKERS. VALIDATION EXPERIMENTS

| ES cell line | Experiment | Stage II |      |        | Stage III |     |      | Stage IV |      |          | Stage V |     |     |           |            |         |
|--------------|------------|----------|------|--------|-----------|-----|------|----------|------|----------|---------|-----|-----|-----------|------------|---------|
|              |            | Pax6     | Sox1 | Nestin | %Nestin   | Dcx | Tau  | %Tau     | Otx2 | %Otx2    | Th      | Dcx | Tau | %Tau      | %Th+ /Tau+ | Outcome |
| B6G-eGfp     | 7          | 9        | 8.2  | 9.9    | 9.3±3.3   | 6.8 | 10.4 | 4.2±1.8  | 5.7  | 15.1±3.3 | 7.8     | 3.4 | 3.4 | 26.5±10.4 | 11.4±3.4   | +       |
| B6G-eGfp     | 8          | 10.2     | 9    | 10.1   | 10.1±4.7  | 7.3 | 11.5 | 2.1±1.9  | 5.5  | 15.8±2.9 | 7.7     | 2.5 | 2.3 | 34.3±8.7  | 10.5±2.6   | +       |
| B6G-eGfp     | 9          | 9.7      | 8.3  | 10.3   | 8.5±4.5   | 6.8 | 11.1 | 2.8±2.4  | 4.8  | 17.2±3.8 | 7.1     | 4.2 | 3.8 | 24.3±7.5  | 12.1±4.1   | +       |

For quantitative RT-PCR data, levels of expression are presented as  $\Delta Ct$  for each experiment.  $\Delta Ct > 14$  is considered as not detected. For quantitative immunostaining, data represent percentages of positive cells relative to the nuclei stained with DAPI or relative to Tau-positive cells (for Th counting) and are presented as mean  $\pm$  SEM,  $n=3$ .
