# Supplementary material
Source: PubMed Central journal article supplement (PMC3549628)
Supplement: Supp_Table4.pdf [file Supp_Table4.pdf]

SUPPLEMENTARY TABLE S4. MOLECULAR PROFILING FOR THE NON-NEURAL AND NON-MIDBRAIN MARKERS IN THE 5-STAGE DOPAMINERGIC DIFFERENTIATION EXPERIMENTS WITH POSITIVE (+) AND NEGATIVE (-) OUTCOME REGARDING THE TH EXPRESSION IN STAGE V

|           | $\Delta Ct$ | <i>Non-neural markers</i> |              |            | <i>Non-midbrain markers</i> |             |              |              |
|-----------|-------------|---------------------------|--------------|------------|-----------------------------|-------------|--------------|--------------|
|           |             | <i>Brachyury</i>          | <i>Gata4</i> | <i>Afp</i> | <i>Foxg1</i>                | <i>Irx5</i> | <i>Hoxb1</i> | <i>Hoxb9</i> |
| Stage I   | (+)         | >14                       | >14          | >14        | >14                         | >14         | >14          | >14          |
|           | (-)         | >14                       | >14          | >14        | >14                         | >14         | >14          | >14          |
| Stage II  | (+)         | 13.5±0.5                  | >14          | 13.6±0.4   | >14                         | >14         | >14          | >14          |
|           | (-)         | 12.3±0.2                  | 13.1±0.6     | 12.9±0.1   | >14                         | 13.5±0.5    | >14          | >14          |
| Stage III | (+)         | 6.8±1.2                   | 12.4±1.6     | 11.0±2.5   | 6.0±0.5                     | 12.0±0.2    | >14          | >14          |
|           | (-)         | 5.1±0.4                   | 9.9±0.9      | 11.1±1.9   | 6.2±0.4                     | 11.3±0.4    | >14          | >14          |
| Stage IV  | (+)         | 8.8±0.5                   | 13.5±0.5     | 13.4±0.6   | 5.5±0.4                     | 9.5±0.5     | >14          | >14          |
|           | (-)         | 6.0±1.1                   | 9.4±1.7      | 12.0±1.1   | 5.5±0.3                     | 9.8±0.3     | >14          | >14          |
| Stage V   | (+)         | 12.9±1.1                  | >14          | >14        | 5.1±0.4                     | 6.6±0.2     | >14          | 10.8±0.3     |
|           | (-)         | 8.7±2.0                   | 9.1±2.6      | 12.3±0.9   | 5.3±0.4                     | 6.4±0.3     | >14          | 11.2±0.3     |

The non-neural markers include the mesodermal and endodermal markers *Brachyury*, *Gata4*, and *Afp*. The non-midbrain markers include the forebrain marker *Foxg1*, the diencephalic marker *Irx5*, the hindbrain marker *Hoxb1*, and the spinal cord marker *Hoxb9*. Data represent  $\Delta Ct$  values for 3 (+) and 3 (-) experiments and are presented as mean±SEM,  $\Delta Ct > 14$  was considered as not detected.
